1 **Reproductive health needs of Human papillomavirus (HPV) Positive women: A systematic**  
2 **review**

3 **Running Title: HPV women Reproductive health needs**

4  
5 **Mina Galeshi<sup>1</sup>, Hoda Shirafkan<sup>2</sup>, Shahla Yazdani<sup>3</sup>, Zahra Motaghi<sup>4\*</sup>**

- 6 1. Student Research Committee, School of Nursing and Midwifery, Shahroud University of  
7 Medical Sciences, Shahroud, Iran  
8 2. Social Determinants of Health Research Center, Health Research Institute, Babol  
9 University of Medical Sciences, Babol, Iran.  
10 3. Cancer Research Center, Health Research Institute, Babol University of Medical  
11 Sciences, Babol I.R.Iran  
12 4. Department of Reproductive Health, School of Nursing and Midwifery, Shahroud  
13 University of Medical Sciences, Shahroud, Iran

14  
15  
16  
17 Corresponding Author: DR .Zahra Motaghi

18 Email: [galeshi\\_m@yahoo.com](mailto:galeshi_m@yahoo.com)

19 Phone:00989119119331

20 Address: Shahroud University of Medical Sciences and Health Services, Hafte Tir Square,  
21 Shahroud, Iran

22 Fax: 009823-32391609

23 Postal Code: 3614773955  
24  
25  
26  
27  
28  
29

30

31 **Abstract**

32 **Background:** Human papillomavirus is one of the most important transmitted viruses that causes  
33 of cervical cancer.

34 In women undergoing cervical screening, it is important to be aware of ways to reduce anxiety.  
35 The present systematic review conducted to determine the reproductive health needs of women  
36 with HPV.

37 **Methods:** In this systematic review, articles without time constraints searched in PubMed,  
38 Scopus, Web of Science, Google Scholar and Iranian Magiran, SID and Iranmedex.

39 Keywords used: HPV, Information, Want, Need, Know, etc. and their Persian equivalents in the  
40 title and abstract of the articles.

41 Papers after identification by two researchers Contradictions evaluated and discussed with the  
42 third author.

43 **Results:** At first 1056 articles retrieved which after removing, 13 articles published between 2004-  
44 2021 were entered. The studies were qualitative (N=9), quantitative (N=3), and one was  
45 unclear. Most qualitative studies collected data using individual interviews (N=7), two qualitative  
46 studies, narratives of HPV patients from a website of patient experiences and questions. The  
47 quality evaluation showed that good=8, Average=2, and one was of poor. There is not enough  
48 information about Friedman AL et al and Garland SM articles to check the quality, but since  
49 these studies were valuable, they included in the study according to the opinion of the research  
50 team.

51 **Conclusion:** Surveys showed that the majority of women had unanswered questions about their  
52 HPV test results. The information that women thought was helpful in interpreting their test  
53 results included having a high-risk type of HPV, the risk of short-term and long-term cancer, and  
54 cancer survival statistics for the virus. Women also needed information about sexual  
55 transmission, how HPV tested positive in a long-term relationship, and the potential  
56 consequences for their partners and the risk of re-infection. Younger women had questions about  
57 whether HPV could affect fertility.

58 **Keywords:** HPV, Reproductive health, need

59

60

## 61 **Introduction**

62 Human papillomavirus (HPV) is one of the most important sexually transmitted viruses (1). This  
63 virus is one of the causes of cervical cancer (2). Although this cancer has many environmental  
64 and genetic causes (such as smoking, early marriage, high parity, etc.), the most important cause  
65 is infection with HPV (3). Cervical cancer is the second most common cancer in women, with  
66 500,000 new cases reported each year (4). Various and extensive studies have been conducted to  
67 investigate the prevalence of HPV infections in different countries as well as in Iran, which  
68 indicates its increasing prevalence in the world (5-7). The prevalence of this virus in the world is  
69 between 10.5-55.4% and in Iran, it is 49.5% (6, 7). The prevalence of genital HPV infection in  
70 the United States among women aged 18 to 59 years was 40% for all types of HPV and 20% for  
71 high-risk HPVs (8).

72 In general, cervical cancer is both preventable and treatable, and its prevalence is 6 times higher  
73 in developing countries than in developed countries, mainly due to differences and the lack of  
74 appropriate screening programs in these countries (9). More than 95% of cervical cancers are  
75 attributed to the papillomavirus (10). More than 100 strains of the virus have been identified, but  
76 types 16 and 18 are the most important strains of the virus in developing cervical cancer (1).  
77 Types 6 and 11 of this virus cause warts in the vulva (11), vagina, cervix, and penis (12).

78 This disease affects the quality of life of individuals and imposes financial costs on health  
79 systems (13). It has been found that 35-65% of people become infected with HPV during sex  
80 (14). Understanding cervical cancer, along with being involved with HPV infection, raises  
81 questions about needs and preferences. In women undergoing cervical cancer screening, it is  
82 important to be aware of ways to minimize anxiety. Previous research has been more limited to  
83 the field of HPV DNA testing (15, 16). HPV DNA testing included information on HPV disease,  
84 prevention, treatment, and risk of cancer (17).

85 Having an HPV test and getting the result can cause undesirable psychosocial reactions. To  
86 prevent anxiety and psychological distress, education and counseling are increasingly important  
87 for women diagnosed with HPV. Therefore, more attention should be paid to how to  
88 communicate and provide information (18-20).

89 Information challenges and communication gaps for women with HPV in the stages of cervical  
90 cancer screening in primary care, waiting time to refer to a specialist, first consultation, and  
91 Occurs after consultation in specialized care. Relatively little research has shown that health care  
92 providers have knowledge gaps and there is no adequate flow of HPV information between  
93 health care providers and women with HPV (21, 22).

94 Counseling with HPV patients poses special challenges for physicians and patients, especially in  
95 communities where HPV is rare and associated with severe stigma. It will be invaluable to  
96 provide a deep understanding of the challenges, perspectives, experiences, and needs of women  
97 living with HPV positively about healthcare providers at the primary and specialist care levels.  
98 Therefore, the present systematic review was performed to determine the needs of women with  
99 HPV.

## 100 **Material and Methods**

101 The present study was approved by the Ethics Committee of Shahroud University of Medical  
102 Sciences: IR.SHE.REC.1400.154 and after receiving the code from the Prospero system Code:  
103 CRD42021293223 Based on the proposed systematic review and meta-analysis checklist  
104 (PRISMA) was done.

### 105 *Search strategy for identifying papers*

106 Related articles, with electronic search in medical databases such as: PubMed, SCOPUS, Web of  
107 Science, Google Scholar search engine and Iranian Magiran, Scientific Information Database and  
108 Iranmedex and additional articles with a gray literature search using OpenGrey ([www.open](http://www.open)  
109 [grey.eu](http://grey.eu)) were identified. Without language restrictions and the date of publication of the article  
110 until December 2021 was reviewed.

111 Keywords used included: (HPV Human Papillomavirus), Alphapapillomavirus, (Human  
112 Papillomavirus, HPV), Information, Want, Need, Know, Qualitative Research, theoretical  
113 framework, Comparative Analysis, and their Persian equivalents and the combination of  
114 keywords with or, and in the title and abstract of the articles.

115

116

117 *Selection process*

118 As the reproductive health needs of women with HPV were not fully understood, a  
119 comprehensive and systematic study was conducted on the subject. Inclusion criteria include  
120 Studies related to the needs of women with HPV, Conference-related abstracts, and Exclusion  
121 criteria: Studies related to HPV in men, Complications of HPV, HPV-related risk factors,  
122 cervical cancer, Treatment of cervical cancer or colposcopy, commentaries, opinion pieces, and  
123 editorials.

124 *Data extraction*

125 All the articles obtained in the introductory search at first reviewed by title, then Abstract, and  
126 finally their full text. The articles were reviewed by two people independently. The names of the  
127 authors and the journal were not hidden from reviewers. Disagreements between reviewers were  
128 decided by negotiating with a third reviewer until a final agreement was reached. The data  
129 extracted for analysis including the author's name, year of the study, place of the study, study  
130 method, and the sample size in each group were entered into the electronic datasheet.  
131 Researchers contacted their authors for more information when they could not retrieve articles  
132 from authorized databases. All studies were reviewed for duplication. For each study, the data is  
133 listed in the table based on the study checklist.

134 *Quality assessment*

135 A quantitative/qualitative adjusted checklist (CASP) was used to critically evaluate the articles.  
136 The Checklist (CASP) is a standard tool for evaluating articles, developed by the JAMA Group  
137 in 1994, and is the oldest and most widely used critical evaluation tool for a variety of  
138 articles/studies (23).

139 The present checklist was 10 items to help understand qualitative research. How to use this tool  
140 for evaluating qualitative studies is as follows: When evaluating, three general issues should be  
141 considered first. A: Are the study results valid enough?, B: What are the results? A: Will the  
142 results help locally? The first two questions are systematically screening questions and can be  
143 answered quickly. If the answer to both is "yes", the remaining questions are continued each item  
144 was assigned a score of 2 (including that item in the article) or zero (not paying attention to the

145 item in the article) and one (cannot be said) and the total score of this checklist was between 0-  
146 20.

147 To evaluate cross-sectional studies, this tool consisted of 18 items, and each item was given a  
148 score of one. Including that item in the article (or zero) was considered as not paying attention to  
149 the item in the article. Attitude evaluation (3 items), study design (5 items), and results (5 items)  
150 were divided and the total score of this checklist varied between 0-18.

151 After carefully reading the full text of each article, an article quality evaluation checklist was  
152 completed by the first researcher and items were scored. Reassessment was performed in the  
153 same way by the second researcher. If there was no agreement on scoring the items, the final  
154 score would be taken in a joint session.

155 In the next step, these articles were compared in terms of scores obtained in each of the four  
156 areas as well as in terms of total scores. Also, the qualitatively reviewed articles were divided  
157 into three categories of good, medium, and poor quality articles according to the scores obtained  
158 from this checklist. Total score 20 high quality; 16-19 Medium quality;  $\leq 15$  was considered low  
159 quality, also the articles reviewed cross-sectional in consultation with experts, scores of 75% of  
160 the total score and above as good quality (score  $\geq 13$ ), scores between 25-25% of the total score  
161 as average quality (scores 6-12) and scores less than 25% of the total score (score 5 and below)  
162 were divided as poor quality (24, 25).

### 163 *Analysis*

164 Quantitative and qualitative findings were analyzed separately. The results of quantitative studies  
165 were reported descriptively by first creating an initial combination of findings, existing  
166 relationships and data strength were examined.

167 For qualitative studies, a thematic synthesis was performed by examining the text line by line in  
168 the results section and discussing and then identifying descriptive topics.

### 169 **Results**

170 In the search of databases, at first 1056 articles were retrieved, which after removing 963  
171 duplicate and unrelated articles, 61 articles were evaluated based on inclusion criteria  
172 (Flowchart).

173 Studies were conducted in the United States (N=5), Europe (N=4), Asia (N=4), and published  
174 between 2004-2021. The studies were mostly qualitative (N=9), the study was quantitative  
175 (N=3), and one type of study was unclear. Most qualitative studies collected data using  
176 individual interviews (N=7), two qualitative studies, narratives of HPV patients from a website  
177 of patient experiences and questions. The characteristics of the participant and the study are  
178 shown in the table (Table 1).

179 The results of the overall quality evaluation of these articles showed that 8 articles were of good  
180 quality, 2 were of average quality and one was of poor quality. There is not enough information  
181 about Friedman AL et al and Garland SM articles to evaluate the quality, but since these studies  
182 were valuable, they were included in the study according to the opinion of the research team.

183 The results of the article evaluation are divided into four areas of the checklist, the total score of  
184 each article, and article quality in (Tables 2 and 3).

185 Summary of the needs presented by HPV women in qualitative studies including:

186 People with the virus cognition about HPV and cervical cancer, but did not have the necessary  
187 knowledge and awareness about it (26). They were confused about the nature of the disease, its  
188 severity, transmission, types, treatment, and instructions for the HPV, and needed to have  
189 complete information (27). Therefore, it is necessary to help patients understand the results of  
190 their test and their importance. Do not experience unnecessary fear, anxiety, or stigma and seek  
191 follow-up and recommendations to meet the patient's needs.

#### 192 Signs, Symptoms, Transmitted, Cause, Consequences of HPV

193 People with the cause of HPV and how it is transmitted, the signs and symptoms of HPV  
194 infection and cervical cancer, how to get screened for cervical cancer, the consequences of the  
195 virus and its effects (*for example, does the virus always cause cervical cancer?*), *Timeline (for*  
196 *example, how long does HPV cause cervical cancer?), Control and treatment (can it be*  
197 *prevented?), Information on how long the infection stays in the body, And does it lead to*  
198 *cancer?* They needed to have complete information because they had stated that it would reduce  
199 their anxiety (25, 28-30).

#### 200 HPV and sexual partner

201 Women with HPV needed counseling on how to communicate and deal with a sexual partner.  
202 Because some women expressed concern about their husbands' infidelity and a lack of trust was  
203 expressed between the couple (31).

204 *When I got HPV, How do I tell my partner what to say? What effect does HPV have on sexual*  
205 *life? Because sometimes these issues lead to uncertainty and stress and in severe cases lead to the*  
206 *breakdown of relationships (28).*

207 The most common question asked by women with HPV was: *which sexual partner (active or*  
208 *former) did the infection come from? Did my partner get it from a previous relationship or did*  
209 *he or she betray me? When HPV is diagnosed in a couple, what are the consequences for the*  
210 *spouse and sexual partner? Will her sexual partner get it too? Should her partner test and follow*  
211 *up? When a couple is infected with HPV and is being treated, will they get the virus again from*  
212 *their partner? Will they constantly infect each other? Will they use a condom? Can I have sex?*  
213 *Can a person get HPV orally or by hand? (32, 33).*

#### 214 Seeking needed information by women with HPV

215 Because many women with the condition felt that they did not have enough information about  
216 HPV, many sought more information, including the Internet (social media, blogs, and websites  
217 provided by labs and private professionals) (34). Their health care providers and other women  
218 living with HPV). They found finding information reliable and up-to-date challenging. Most  
219 women prefer the information provided by official websites. Women who were regular Internet  
220 users reported finding useful information (31). However, it was often not easy for them to  
221 interpret and determine the correctness or incorrectness of the material. Women reported that  
222 most cases of finding information about HPV, along with the effect of the virus on genital warts  
223 and other sexually transmitted diseases, in which risk factors such as having multiple sexual  
224 partners were highlighted, some women were very upset and experienced a sense of shame and  
225 embarrassment (35). Or, in many cases, this information was in addition to information related to  
226 uterine cancer, which led to fear, anxiety, and stress in them. It seems that the information that  
227 women are looking for and the way their doctor informs them can affect their psychological  
228 response to HPV infection and is one of the issues that is considered important in follow-up (36).

#### 229 HPV and social consequences

230 Dysfunction or inability to perform daily activities, limitation in relationships with others,  
231 limitation of social activities, shock, insecurity, and fear of deformity of the limbs following the  
232 development of genital warts and its impact on quality of life were among the challenges (37).  
233 Women with HPV experienced it during the illness. Therefore, women with HPV need



234 psychosocial care at different stages of the disease, so that non-fulfillment of psychosocial needs  
235 can complicate the course of treatment and recovery (38).

#### 236 Reproductive health needs in women with HPV

237 Women with HPV raised some issues related to fertility, and the need for proper counseling on  
238 the impact of the virus on reproductive health was felt (34).

239 Many women reported seeking information about fertility and pregnancy from various sources.

240 Many women seek information about the adverse effects of HPV on male fertility, the negative  
241 impact of HPV on female fertility, the effect of treatments and vaccinations on female fertility  
242 and its relationship to female fertility, maternal health threats during pregnancy, adverse  
243 pregnancy outcomes, fetal harm, Fear of having a newborn This fear was so great that some  
244 people who decided to become pregnant postponed their pregnancy program until the cytology  
245 results improved so that they could receive appropriate counseling during this time. Women also  
246 noted the association between genital HPV infection and various maternal-fetal variables and  
247 pregnancy complications such as miscarriage and preterm delivery Therefore, these women need  
248 to know what to do to protect their reproductive health and reduce its complications against  
249 infection (30).

250 Since genital warts can multiply during pregnancy, removing warts during pregnancy was one of  
251 the most important issues. Women with genital warts have revealed the need for information  
252 about the teratogenicity of some wart removal treatments. They were anxious about any threat it  
253 might pose to the fetus (37).

254 Information on contraception, fear of premature menopause, fear of cervical cancer, fear of  
255 hereditary cancer caused by HPV were other issues raised in this area (30).

256 To prevent unplanned pregnancies, women with HPV needed more information to choose the  
257 preferred method of contraception. Because long-term use of birth control pills increases the risk  
258 of cervical cancer for women with persistent HPV, they needed guidance in changing their  
259 method of contraception. Women sought information on the negative effects of combined oral  
260 contraceptive pills (COCs) and levonorgestrel (LNG) pills on their cellular changes (39).

#### 261 HPV screening and cervical cancer and vaccinations

262 Another piece of information that infected women needed to know about was screening. They  
263 needed to know how helpful these screenings can be in diagnosing uterine cancer (37). These  
264 include: *How is screening done? Is a Pap smear enough to diagnose? Can HPV be diagnosed*

265 *before cancer develops? In addition to annual checkups, what type of checkups are started at*  
266 *what intervals and at what age? What does the [HPV] test include? Can I get an HPV test from*  
267 *a doctor? How long does it take to determine the result of an HPV test? What is the difference*  
268 *between an HPV test and a Pap smear?(28)*

269 The women also asked for information about the effect of the vaccine, side effects, long-term  
270 effects, mechanism of action of the vaccine, number of doses received, and the age range for  
271 vaccination (29).

## 272 **Quantitative studies**

273 SungJong Lee, et al. In their quantitative study showed 10 categories for topics and sample  
274 questions with different topics. Of the 3,062 people who visited the HPV website, 2,330 asked  
275 general questions and 732 asked private questions. The type and frequency of public and private  
276 questions showed a statistical difference between the two groups ( $p < 0.001$ ).

277 From 2004 to 2011 the most common questions, respectively: a. Treatment of HPV and cervical  
278 dysplasia (37.8) 1156, b. How HPV transmission (22.3) 684, c. HPV regression (15.7) 481, d.  
279 Genital warts (5.7) 174, e. Risk factors for cervical cancer (4.8) 147, f. HPV vaccination 116  
280 (8.3), g. Prevention of HPV 90 (9.2), h. Vaginal discharge (2.8) 86, i. HPV and pregnancy (2.6)  
281 81, j. Laryngeal cancer and HPV 47 (1.5) was (37).

282 Sandra Millon Underwood et al. showed that sexual behavior and chronic HPV infections are  
283 risk factors for cervical cancer. Sexual behavior and chronic HPV infections are risk factors for  
284 cervical cancer. When asked to describe their sexual activity, 76.8% (352) of women reported  
285 having had sexual activity in the past six months. Among them, 2.62 (219) reported, having a  
286 sexual partner, 15.6% (55) two sexual partners and 22.2% (78) three or more partners in the past  
287 six months. The most common questions included: cause of HPV, cause of cervical cancer,  
288 signs, and symptoms of HPV infection, signs and symptoms of cervical cancer, HPV and  
289 cervical cancer screening, HPV vaccine, HPV and cervical cancer risk management (28).

290 Kathrin Milbury, et,al in their study showed that 66% of patients were aware of their HPV  
291 status, but only 35 percent identified HPV as a possible cause of their cancer. Most patients  
292 disclosed their HPV status to their partner, 41% talked about transmitting the virus, and only  
293 23% felt aware of the potential risks of transmission and precautions. 39% of their oncologists  
294 want to discuss more HPV issues, and 58% sought it from other sources. More than a third said  
295 they were interested in more information about HPV.

296 Women are interested in receiving any information. 18% want more information on how HPV  
297 causes cancer. 15% wanted information on HPV vaccination (especially whether vaccinating  
298 their children to prevent cancer), 10% wanted information on how to prevent transmission to  
299 their partner, and 10% wanted to know if there was any cure for Is there HPV or not? (33).

## 300 **Discussion**

301 Based on the review, this systematic review is one of the few review studies that  
302 comprehensively addresses the needs of women with HPV. The potential advantage of this study  
303 is that the HPV-related questions and needs raised by patients were collected. Recently, many  
304 researchers have used written surveys, interviews, and other data collection methods to assess  
305 knowledge about HPV among women. They found that women have relatively little knowledge  
306 of HPV and suggested using more training programs (40, 41). In addition, many patients become  
307 confused after hearing their doctor's description of HPV. As a result, many patients search the  
308 Internet for seeking information about HPV, but there are still many questions for them (42).

309 According to the findings, most people, especially when it comes to frequently asked questions,  
310 really want to find out about the whole disease process, from HPV infection to recovery (35).

311 Since most of the studies studied were qualitative studies, this study was able to identify a wide  
312 range of needs of affected women. The needs of women with HPV lead to fear, anxiety and  
313 worry. Their anxiety is largely due to their poor knowledge of the virus. Therefore, women who  
314 are screened for or exposed to the virus also need quality information about HPV and its role in  
315 cervical cancer when faced with an abnormal result.

316 Physicians potentially play an important role in modulating the effects of diagnosis through how  
317 HPV is diagnosed (43). Therefore, recognizing these needs can help health professionals  
318 understand what questions they are expected to answer.

319 KirstenMcCaffery and Les Irwig showed in her study that women needed more information  
320 about different types of HPV, transmission, effects of the virus on sexual partners, prevalence,  
321 delay and regression of HPV, management options, and infection consequences for cancer and  
322 fertility risk. Uncertainty about key aspects of HPV, how the physician announced the outcome,  
323 and how the outcome was presented (letter, telephone, or consultation) affected the  
324 psychological response of women with HPV (35).

325 Women's experience of searching the Internet for more information on HPV has been reported as  
326 problematic, anxious, and stigmatizing infection in the community, as the information provided

327 is often related to other sexually transmitted infections and multiple sexual partners as a risk  
328 factor for Infections are prominent (44). Sung-Jong Lee shows in his study that when people go  
329 to a website about HPV, they are looking for "HPV treatment and cervical dysplasia", "HPV  
330 transmission", "HPV cure", "Genital warts" And "risk of cervical cancer." Also, our results  
331 showed that "genital warts" and "HPV and pregnancy" may be considered embarrassing topics.  
332 Therefore, these findings can be used to provide informed recommendations for clinical or  
333 Internet-based communication with patients and the general public (37).

334 Sandra Millon Underwood In reviewing the questions reported by women with HPV, mentioned  
335 five related topics such as: cervical cancer, HPV/cervical cancer prevention, and risk  
336 management (28).

337 Numerous questions asked by women focused on the origin of HPV, the different types of HPV,  
338 HPV and risk factors for cervical cancer, the risk factors associated with HPV transmission, and  
339 the development of cervical cancer. Similar questions were asked about "early signs", "warning  
340 signs", symptoms associated with HPV infection and cervical cancer, and if, when and how often  
341 women should be tested. However, most of the questions asked by women focused on HPV and  
342 cervical cancer prevention and risk management. Among them were specific questions about  
343 how HPV was transmitted. Questions about the proper use and effectiveness of male and female  
344 inhibitory methods (eg, condoms) to reduce the risk of HPV and cervical cancer; Questions  
345 about the safety, availability and cost of the HPV vaccine; and questions about the need for  
346 further community education and information (28).

### 347 **Conclusion**

348 Surveys showed that the majority of women had unanswered questions about their HPV test  
349 results. The information that women thought helped interpret their test results included having a  
350 high-risk type of HPV, the risk of short-term and long-term cancer, and cancer survival statistics  
351 for the virus. Women also needed information about sexual transmission, how HPV tested  
352 positive in a long-term relationship, and the potential consequences for their partners and the risk  
353 of re-infection. Younger women had questions about whether HPV could affect fertility.

354 HPV information should be scientifically accurate and minimize any possible stigma that may be  
355 associated with the infection due to its sexually transmitted nature. It was found that seeking  
356 information from alternative sources also increased women's anxiety by providing information

357 about HPV in the context of other highly sexually transmitted diseases and highlighting several  
358 sexual partners as a risk factor for infection.

359 The strength of this study is that it was a comprehensive and systematic review using PRISMA  
360 guidelines. In addition, an extensive search strategy was performed without any history or  
361 language restrictions. It is possible that due to the range of terms that can be used to describe the  
362 needs, some eligible studies may not have been identified in our search, however, we did forward  
363 and backward citation searching to reduce this possibility. The data were also extracted by one  
364 author and reviewed independently by the second author. While qualitative synthesis allows us to  
365 identify a range of different factors that help women with HPV. However, since the majority of  
366 studies were qualitative, meta-analysis was not possible. It is suggested that future studies should  
367 measure the effect of raising awareness about HPV over time to determine whether raising  
368 awareness leads to improved health of infected women. Knowing when and how this response to  
369 needs is most effective can help determine the most appropriate interventions.

#### 370 **Abbreviations**

371 HPV: Human Papillomavirus

372 COCs: contraceptive pills

373 LNG: levonorgestrel

#### 374 **Declarations**

#### 375 **Details of Ethics Approval**

376 This study has been performed in accordance with the Declaration of Helsinki and has been  
377 reviewed and approved by the Ethics Committee of Shahroud University of Medical Sciences  
378 The: (IR.SHE.REC.1400.154) and after receiving the code from the Prospero system Code:  
379 CRD42021293223 Based on the proposed systematic review and meta-analysis checklist  
380 (PRISMA) was done.

#### 381 **Consent of participate**

382 Not applicable

#### 383 **Consent for publication**

384 Not applicable

#### 385 **Availability of data and materials**

386 The data that support the findings of this study are available from the corresponding author,  
387 [MG], upon reasonable request.

### 388 **Competing Interests**

389 The authors have no conflict of interest.

### 390 **Funding**

391 Not applicable

### 392 **Acknowledgments**

393 Not applicable

### 394 **Authors' Contributions**

395 MG, ZM,SHZ, HSH designed the study HSH and ZM planned and undertook the analysis.

396 MG, ZM, and HSH wrote the initial and subsequent drafts of the manuscript. MG, SHZ, ZM and

397 HSH contributed to revising the manuscript. All authors read and approved the final manuscript.

398

399

400

401

402

403

404

405

406

407

408

409

410

411

## 412 References

- 413 1. Berek JS. *Berek & Novak's Gynecology Essentials*: Lippincott Williams & Wilkins;  
414 2020.
- 415 2. Wu J, Ding C, Liu X, Zhou Y, Tian G, Lan L, et al. Worldwide burden of genital human  
416 papillomavirus infection in female sex workers: a systematic review and meta-analysis.  
417 *International Journal of Epidemiology*. 2021;50(2):527-37.
- 418 3. Nassar ACF, de Oliveira Garcia D, Salvio JRC, Altieri NGGL, Iziqur LP, Ispier C. HPV  
419 infection as a risk factor of esophagus squamous cell carcinoma and its prognosis. *Rev Med (São*  
420 *Paulo)*. 2021;100(2):144-51.
- 421 4. Sethi S, Ali A, Ju X, Antonsson A, Logan R, Canfell K, et al. A systematic review and  
422 meta-analysis of the prevalence of human papillomavirus infection in Indigenous populations—A  
423 Global Picture. *Journal of Oral Pathology & Medicine*. 2021.
- 424 5. Bruce J, Drury N, Poobalan AS, Jeffrey R, Smith WCS, Chambers WJP. The prevalence  
425 of chronic chest and leg pain following cardiac surgery: a historical cohort study. 2003;104(1-  
426 2):265-73.
- 427 6. Escobar N, Plugge E. Prevalence of human papillomavirus infection, cervical  
428 intraepithelial neoplasia and cervical cancer in imprisoned women worldwide: a systematic  
429 review and meta-analysis. *J Epidemiol Community Health*. 2020;74(1):95-102.
- 430 7. Kesheh MM, Keyvani H. The prevalence of HPV genotypes in Iranian population: An  
431 Update. *Iranian journal of pathology*. 2019;14(3):197.
- 432 8. McQuillan GM, Kruszon-Moran D, Markowitz LE, Unger ER, Paulose-Ram R.  
433 Prevalence of HPV in adults aged 18-69: United States, 2011-2014: US Department of Health  
434 and Human Services, Centers for Disease Control and ...; 2017.
- 435 9. Safaei A, Khanlari M, Momtahan M, Monabati A, Robati M, Amooei S, et al. Prevalence  
436 of high-risk human papillomavirus types 16 and 18 in healthy women with cytologically  
437 negative pap smear in Iran. *Indian Journal of Pathology and Microbiology*. 2010;53(4):681.
- 438 10. Sasieni P, Castanon A. Call and recall cervical screening programme: Screening interval  
439 and age limits. *Current Diagnostic Pathology*. 2006;12(2):114-26.
- 440 11. Wakeham K, Kavanagh K, Cuschieri K, Millan D, Pollock KG, Bell S, et al. HPV status  
441 and favourable outcome in vulvar squamous cancer. *International journal of cancer*.  
442 2017;140(5):1134-46.
- 443 12. Dillner J, Kjaer SK, Wheeler CM, Sigurdsson K, Iversen OE, Hernandez-Avila M, et al.  
444 Four year efficacy of prophylactic human papillomavirus quadrivalent vaccine against low grade  
445 cervical, vulvar, and vaginal intraepithelial neoplasia and anogenital warts: randomised  
446 controlled trial. *BMJ (Clinical research ed)*. 2010;341:c3493.
- 447 13. Leung W, Chan P, Lau K, Ho K. The prevalence of human papilloma virus in the anal  
448 region of male Chinese attendees in three public sexually transmitted disease clinics in Hong  
449 Kong. *Hong Kong J Dermatol Venereol*. 2011;19(1):6-13.
- 450 14. Lo Cigno I, Calati F, Albertini S, Gariglio M. Subversion of host innate immunity by  
451 human papillomavirus oncoproteins. *Pathogens*. 2020;9(4):292.
- 452 15. Anhang R, Goodman A, Goldie SJ. HPV communication: review of existing research and  
453 recommendations for patient education. *CA: A Cancer Journal for Clinicians*. 2004;54(5):248-  
454 59.

- 455 16. Ciavattini A, Carpini GD, Giannella L, Del Fabro A, Banerji V, Hall G, et al. An online  
456 survey on emotions, impact on everyday life, and educational needs of women with HPV  
457 positivity or abnormal Pap smear result. *Medicine*. 2021;100(45).
- 458 17. Waller J, McCaffery K, Nazroo J, Wardle J. Making sense of information about HPV in  
459 cervical screening: a qualitative study. *British journal of cancer*. 2005;92(2):265-70.
- 460 18. Bennett KF, Waller J, Ryan M, Bailey JV, Marlow LA. Concerns about disclosing a  
461 high-risk cervical human papillomavirus (HPV) infection to a sexual partner: a systematic review  
462 and thematic synthesis. *BMJ sexual & reproductive health*. 2021;47(1):17-26.
- 463 19. McBride E, Marlow LA, Forster AS, Ridout D, Kitchener H, Patnick J, et al. Anxiety and  
464 distress following receipt of results from routine HPV primary testing in cervical screening: The  
465 psychological impact of primary screening (PIPS) study. *International journal of cancer*.  
466 2020;146(8):2113-21.
- 467 20. Dodd RH, Mac OA, McCaffery KJ. Women's experiences of the renewed National  
468 Cervical Screening Program in Australia 12 months following implementation: a qualitative  
469 study. *BMJ open*. 2020;10(7):e039041.
- 470 21. O'Connor M, O'Donovan B, Waller J, Céilleachair AÓ, Gallagher P, Martin C, et al.  
471 Communicating about HPV in the context of head and neck cancer: A systematic review of  
472 quantitative studies. *Patient education and counseling*. 2020;103(3):462-72.
- 473 22. Denny-Smith T, Bairan A, Page MC. A survey of female nursing students' knowledge,  
474 health beliefs, perceptions of risk, and risk behaviors regarding human papillomavirus and  
475 cervical cancer. *Journal of the American Academy of Nurse practitioners*. 2006;18(2):62-9.
- 476 23. Schadewaldt V. How to use this appraisal tool 2015 [Available from:  
477 [www.reache.files.wordpress.com/2010/03/cross-sectional-appraisal-tool](http://www.reache.files.wordpress.com/2010/03/cross-sectional-appraisal-tool)].
- 478 24. Njau B, Covin C, Lisasi E, Damian D, Mushi D, Boule A, et al. A systematic review of  
479 qualitative evidence on factors enabling and deterring uptake of HIV self-testing in Africa. *BMC*  
480 *Public Health*. 2019;19(1):1289.
- 481 25. Bahri N, Latifnejad Roudsari R. A Critical Appraisal of Research Evidence on Iranian  
482 Women's Attitude towards Menopause. *The Iranian Journal of Obstetrics, Gynecology and*  
483 *Infertility*. 2015;18(178):1-11.
- 484 26. Alsous MM, Ali AA, Al-Azzam SI, Jalil MHA, Al-Obaidi HJ, Al-Abbadi EI, et al.  
485 Knowledge and awareness about human papillomavirus infection and its vaccination among  
486 women in Arab communities. *Scientific reports*. 2021;11(1):1-8.
- 487 27. Ulasan S, NAHRAWI N, MUSTAFA WA, KANAFIAH SNAM. Knowledge of Human  
488 Papillomavirus (HPV) and cervical cancer among Malaysia Residents: A review. *Sains*  
489 *Malaysiana*. 2020;49(7):1687-95.
- 490 28. Underwood SM, Ramsay-Johnson E, Browne L, Caines N, Dean A, Duval S, et al. What  
491 women in the United States Virgin Islands still want and need to know about HPV, cervical  
492 cancer, and condom use. *Journal of National Black Nurses' Association: JNBNA*. 2010;21(1):25.
- 493 29. Marlow LA, Wardle J, Waller J, Grant N. Human papillomavirus (HPV) information  
494 needs: a theoretical framework. *Journal of Family Planning and Reproductive Health Care*.  
495 2009;35(1):29-33.
- 496 30. Marlow L, Forster AS, McBride E, Rockcliffe L, Kitchener H, Waller J. Information  
497 needs among women taking part in primary HPV screening in England: a content analysis. *BMJ*  
498 *open*. 2020;10(12):e044630.



- 499 31. Symmons SM, Waller J, McBride E. Testing positive for Human Papillomavirus (HPV)  
500 at primary HPV cervical screening: A qualitative exploration of women's information needs and  
501 preferences for communication of results. *Preventive Medicine Reports*. 2021;24:101529.
- 502 32. Verhoeven V, Baay MF, Baay PE, Lardon F, Van Royen P, Vermorken JB. Everything  
503 you always wanted to know about HPV (but could not ask your doctor). *Patient education and*  
504 *counseling*. 2010;81(1):101-5.
- 505 33. Milbury K, Rosenthal DI, El-Naggar A, Badr H. An exploratory study of the  
506 informational and psychosocial needs of patients with human papillomavirus-associated  
507 oropharyngeal cancer. *Oral oncology*. 2013;49(11):1067-71.
- 508 34. Qaderi K, Mirmolaei ST, Geranmayeh M, Farnam F, Hasani SS. 'Does HPV affect my  
509 fertility?' Reproductive concerns of HPV-positive women: a qualitative study. *Reproductive*  
510 *Health*. 2021;18(1):1-11.
- 511 35. McCaffery K, Irwig L. Australian women's needs and preferences for information about  
512 human papillomavirus in cervical screening. *Journal of Medical Screening*. 2005;12(3):134-41.
- 513 36. Anhang R, Wright Jr TC, Smock L, Goldie SJ. Women's desired information about  
514 human papillomavirus. *Cancer*. 2004;100(2):315-20.
- 515 37. Lee S-J, Yun H-J, Lee K-H, Kim C-J, Park J-S. What questions do people ask on a  
516 Human Papillomavirus website? a comparative analysis of public and private questions.  
517 *International journal of medical sciences*. 2012;9(2):142.
- 518 38. Garland SM, Quinn MA. How to manage and communicate with patients about HPV?  
519 *International Journal of Gynecology & Obstetrics*. 2006;94:S106-S12.
- 520 39. Qaderi K, Geranmayeh M, Farnam F, Hasani SS, Mirmolaei ST. Iranian HPV-positive  
521 Women's Needs and Preferences in Relation to Receiving Health Services: A Qualitative Study.  
522 2021.
- 523 40. Chen H, Zhang X, Wang W, Zhang R, Du M, Shan L, et al. Effect of an educational  
524 intervention on human papillomavirus (HPV) knowledge and attitudes towards HPV vaccines  
525 among healthcare workers (HCWs) in Western China. *Human Vaccines & Immunotherapeutics*.  
526 2021;17(2):443-50.
- 527 41. López N, Garcés-Sánchez M, Panizo MB, de la Cueva IS, Artés MT, Ramos B, et al.  
528 HPV knowledge and vaccine acceptance among European adolescents and their parents: a  
529 systematic literature review. *Public health reviews*. 2020;41(1):1-24.
- 530 42. Head KJ, Imburgia TM, Zimet GD, Shew ML. Women's understanding of their pap and  
531 HPV test results: implications for patient-provider communication. *Journal of Communication in*  
532 *Healthcare*. 2017;10(1):37-46.
- 533 43. Nagpal TS, Blake J. Stigma as a Barrier to Care for Human Papillomavirus: A  
534 Commentary Summarizing Literature and Presenting Recommendations for Health Care  
535 Providers. *Journal of Obstetrics and Gynaecology Canada*. 2020;42(10):1276-8.
- 536 44. Gold D. The psychosocial care needs of patients with HPV-related head and neck cancer.  
537 *Otolaryngologic Clinics of North America*. 2012;45(4):879-97.
- 538 45. Friedman AL, Sheppard H, editors. Making sense of HPV and Pap test results: What do  
539 women need and want to know? Findings from CDC qualitative research with women, ages 30-  
540 65 years. The 2008 National STD Prevention Conference; 2008.

541

542

543

544

545

Identification

552

553

554

555

556

Screening

564

565

566

567

568

569

570

Eligibility

576

Included

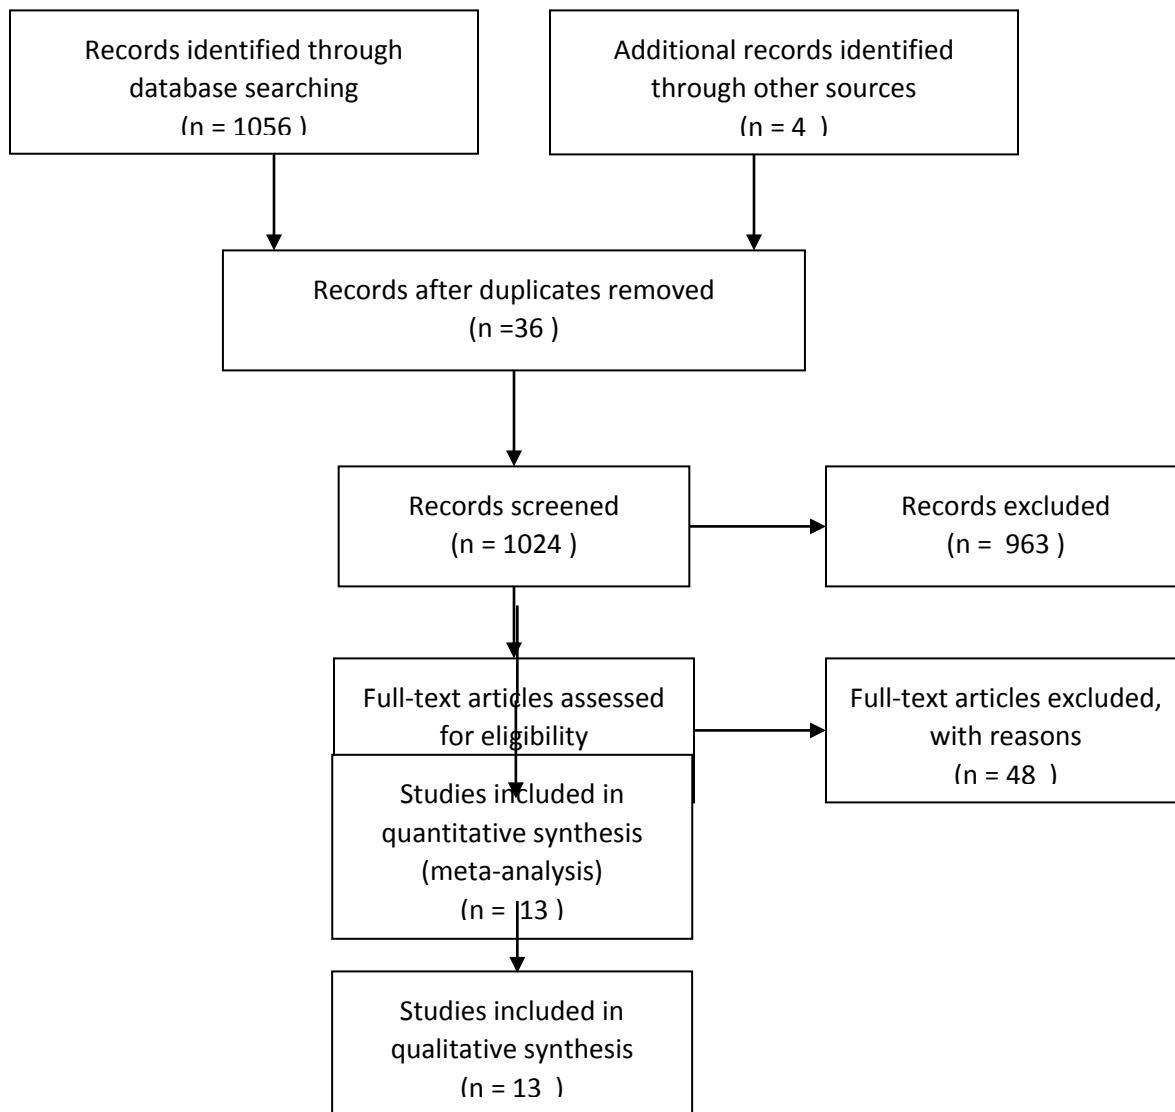

Figure 1: Flow diagram of study selection

579 Table1: Characteristics of studies in the review

| No | Reference                              | Country | Aim                                                                                                                                                                                                          | Participants (n)                                                                                             | Study design                                                                                                                                                                                                                                                                                                       | Analysis                                                     | Disclosure outcomes report                                                                                                                                                                                                                                                                                                                                                                                                                                                                                                                                                                                                                                                                                                                                                                                                                                                                                                                                                                                                                                                                                                 |
|----|----------------------------------------|---------|--------------------------------------------------------------------------------------------------------------------------------------------------------------------------------------------------------------|--------------------------------------------------------------------------------------------------------------|--------------------------------------------------------------------------------------------------------------------------------------------------------------------------------------------------------------------------------------------------------------------------------------------------------------------|--------------------------------------------------------------|----------------------------------------------------------------------------------------------------------------------------------------------------------------------------------------------------------------------------------------------------------------------------------------------------------------------------------------------------------------------------------------------------------------------------------------------------------------------------------------------------------------------------------------------------------------------------------------------------------------------------------------------------------------------------------------------------------------------------------------------------------------------------------------------------------------------------------------------------------------------------------------------------------------------------------------------------------------------------------------------------------------------------------------------------------------------------------------------------------------------------|
| 1  | Sophie Mulcahy Symmons, et al.2021(31) | England | This study aimed to investigate women's information needs and suggestions for improving communication following receiving a positive HPV test result among people with higher and lower levels of education. | <ul style="list-style-type: none"> <li>▪ 30 women</li> <li>▪ age 24 to 63</li> <li>▪ HPV positive</li> </ul> | <ul style="list-style-type: none"> <li>▪ In-depth semi-structured interview</li> <li>▪ Face-to-face interviews</li> <li>▪ 15 women with highly educated and 15 with low-educated women.</li> <li>▪ The women participated in the interview on average 35.5 days after receiving their HPV test results.</li> </ul> | Data were coded using qualitative analysis software NVivo 12 | <p>Summary of information needs in general and among people with higher and lower education including:</p> <p><b>Get test results using letters</b></p> <ul style="list-style-type: none"> <li>✓ Not knowing the test result</li> <li>✓ before receiving the test result</li> <li>✓ Poor knowledge about HPV</li> <li>✓ Try and search to interpret the test result</li> </ul> <p><b>Content and structure of the received letter</b></p> <ul style="list-style-type: none"> <li>✓ Request more information about HPV</li> <li>✓ Request personalization of the sent letter</li> <li>✓ Prioritize the test result by first mentioning the natural cytological result and then the HPV-related result</li> <li>✓ Explain about the next follow-up and additional tests</li> </ul> <p><b>Search for information after receiving the test result</b></p> <ul style="list-style-type: none"> <li>✓ Talk to your doctor about the test result</li> <li>✓ Search for information from cyberspace</li> <li>✓ Receive appropriate information along with providing test results</li> <li>✓ Introducing trusted websites</li> </ul> |

|   |                               |         |                                                                                                               |                                                                                                                                 |                                                                                                                                                                                                                                                                                                                                                                     |                                                                                                                                                                                                                                                                                                                                                                                                                                                                                                                                                                                                                                                                                                                                                                                                                                                                  |                                                                                                                                                                                                                                                                                                                                                                                                                                                        |
|---|-------------------------------|---------|---------------------------------------------------------------------------------------------------------------|---------------------------------------------------------------------------------------------------------------------------------|---------------------------------------------------------------------------------------------------------------------------------------------------------------------------------------------------------------------------------------------------------------------------------------------------------------------------------------------------------------------|------------------------------------------------------------------------------------------------------------------------------------------------------------------------------------------------------------------------------------------------------------------------------------------------------------------------------------------------------------------------------------------------------------------------------------------------------------------------------------------------------------------------------------------------------------------------------------------------------------------------------------------------------------------------------------------------------------------------------------------------------------------------------------------------------------------------------------------------------------------|--------------------------------------------------------------------------------------------------------------------------------------------------------------------------------------------------------------------------------------------------------------------------------------------------------------------------------------------------------------------------------------------------------------------------------------------------------|
|   |                               |         |                                                                                                               |                                                                                                                                 |                                                                                                                                                                                                                                                                                                                                                                     | <ul style="list-style-type: none"> <li>• In the group of people with higher education, people preferred to receive Supportive information. But in the group of people with lower education in terms of understanding and receiving information</li> </ul> <p><b>Questions about test interpretation</b></p> <ul style="list-style-type: none"> <li>✓ Be explicitly informed about the risk of uterine cancer.</li> <li>✓ Ask for information about the cause of HPV and how it is transmitted</li> <li>✓ The effect of HPV on gender and sexual partner</li> <li>✓ The effect of HPV on fertility</li> <li>✓ Lack of clear association between normal cytology and HPV positive test</li> <li>✓ Lack of a clear link between HPV and other sexually transmitted diseases</li> <li>✓ How to share the test result with your partner and sexual partner</li> </ul> |                                                                                                                                                                                                                                                                                                                                                                                                                                                        |
| 2 | Laura Marlow , et al.2020(30) | England | The aim of this study was to investigate more information needs among women undergoing primary HPV screening. | <ul style="list-style-type: none"> <li>▪ 381 women</li> <li>▪ Age d 24-65 who have registered one or more responses.</li> </ul> | <ul style="list-style-type: none"> <li>▪Qualitative study</li> <li>▪The postal questionnaire was completed immediately, 6 and 12 months after receiving the results of the human papillomavirus (HPV) test.</li> <li>▪Ask the participant an open-ended question entitled "Do you have an unanswered question about cervical screening and HPV testing?"</li> </ul> | content analysis                                                                                                                                                                                                                                                                                                                                                                                                                                                                                                                                                                                                                                                                                                                                                                                                                                                 | <p>A total of 921 women who underwent initial HPV screening returned their original questionnaire. A total of 507 free texts were registered (base = 239/931, 6 months = 762/110 and 12 months = 537/68). Results as:</p> <p>Reaction and understanding of test results (45%) 170</p> <ul style="list-style-type: none"> <li>✓ Emotional response</li> <li>✓ Trust the results</li> <li>✓ Meaning of results</li> <li>✓ Impact on sexuality</li> </ul> |

|   |                        |      |                                                                                                                  |                       |                            |                  |                                                                                                                                                                                                                                                                                                                                                                                                                                                                                                                                                                                                                                                                                                                                                                                                                                                                                                                                                                                                                                                                                                                                                                                                                       |
|---|------------------------|------|------------------------------------------------------------------------------------------------------------------|-----------------------|----------------------------|------------------|-----------------------------------------------------------------------------------------------------------------------------------------------------------------------------------------------------------------------------------------------------------------------------------------------------------------------------------------------------------------------------------------------------------------------------------------------------------------------------------------------------------------------------------------------------------------------------------------------------------------------------------------------------------------------------------------------------------------------------------------------------------------------------------------------------------------------------------------------------------------------------------------------------------------------------------------------------------------------------------------------------------------------------------------------------------------------------------------------------------------------------------------------------------------------------------------------------------------------|
|   |                        |      |                                                                                                                  |                       | Was asked.                 |                  | <ul style="list-style-type: none"> <li>✓ Lack of general understanding</li> <li>✓ Epidemiology of HPV</li> <li>✓ Cause of HPV</li> <li>✓ Prevention / treatment of HPV</li> <li>✓ HPV vaccination</li> </ul>                                                                                                                                                                                                                                                                                                                                                                                                                                                                                                                                                                                                                                                                                                                                                                                                                                                                                                                                                                                                          |
| 3 | Qaderi, et al.2020(39) | IRAN | The aim of this study was to evaluate the needs and experiences of HPV positive women receiving health services. | 40 HPV positive women | semi-structured interviews | content analysis | <p>The subject and subcategory of this study include:</p> <ol style="list-style-type: none"> <li><b>1. Communication and counseling skills</b> <ol style="list-style-type: none"> <li>A. Discussion about HPV</li> <li>B. Emotional support and acceptance of the disease</li> <li>C. Provide recommendations</li> <li>D. Clinical considerations</li> </ol> </li> <li><b>2. Commitment to professional principles</b> <ol style="list-style-type: none"> <li>A. Gain the trust of patients</li> <li>B. Avoid financial misconduct</li> <li>C. Assertiveness and privacy</li> <li>D. Clinical considerations</li> </ol> </li> <li><b>3. Providers' knowledge about HPV</b> <ol style="list-style-type: none"> <li>A. Follow the screening instructions</li> <li>B. Avoid misconceptions</li> <li>C. Adopt multilateral approaches</li> </ol> </li> </ol> <p>Other needs and questions of patients include:</p> <ul style="list-style-type: none"> <li>✓ Search for information on HPV types, transmission, spread and removal of the virus from the body</li> <li>✓ Need to request information about other sexually transmitted diseases, the potential benefits of the HPV vaccine, and the risk of HPV-</li> </ul> |

|   |                                |       |                                                                                                                                                                                                                                                        |                                                                      |                                                                                                                                                                                                                                                                                                                                                                                                          |                         |                                                                                                                                                                                                                                                                                                                                                                                                                                                                                                                                                                                                                                                                                                                                                                                                                                                                                                                                                                   |
|---|--------------------------------|-------|--------------------------------------------------------------------------------------------------------------------------------------------------------------------------------------------------------------------------------------------------------|----------------------------------------------------------------------|----------------------------------------------------------------------------------------------------------------------------------------------------------------------------------------------------------------------------------------------------------------------------------------------------------------------------------------------------------------------------------------------------------|-------------------------|-------------------------------------------------------------------------------------------------------------------------------------------------------------------------------------------------------------------------------------------------------------------------------------------------------------------------------------------------------------------------------------------------------------------------------------------------------------------------------------------------------------------------------------------------------------------------------------------------------------------------------------------------------------------------------------------------------------------------------------------------------------------------------------------------------------------------------------------------------------------------------------------------------------------------------------------------------------------|
|   |                                |       |                                                                                                                                                                                                                                                        |                                                                      |                                                                                                                                                                                                                                                                                                                                                                                                          |                         | <p>related cancers</p> <ul style="list-style-type: none"> <li>✓ Questions about HPV cofactors for cervical cancer in women with abnormal cytology</li> <li>✓ Participants look for ways to improve their safety and sexual health</li> </ul>                                                                                                                                                                                                                                                                                                                                                                                                                                                                                                                                                                                                                                                                                                                      |
| 4 | Kathrin Milbury et al.2013(33) | U.S.A | The aim of this study was to evaluate the information and psychosocial needs of patients with oral and pharyngeal squamous cell carcinoma in HPV-positive individuals and to identify the psychosocial challenges associated with HPV-positive cancer. | HPV men and women are positive with the OPSCC and have relationships | <ul style="list-style-type: none"> <li>▪ Exploratory study</li> <li>▪ Use open-ended questions such as "What information and knowledge would you like to know about HPV and related cancer"?</li> <li>▪ Questionnaires used include: Gritz 8-item questionnaire to assess past and present nicotine use and drug interactions</li> <li>▪ 10 item questionnaire (AUDIT) consumption assessment</li> </ul> | analyzed using SPSS v19 | <p>The results of this study include:</p> <ul style="list-style-type: none"> <li>✓ 66% of patients were aware of their HPV status but only 35% of them considered HPV to be a possible cause of cancer.</li> <li>✓ Most patients report their HPV status to their partner.</li> <li>✓ 41% discussed virus transmission and only 23% were aware of potential risks and preventive measures.</li> <li>✓ 39%of patients sought to talk to an oncologist for information on HPV issues, and 58% sought it from other sources.</li> <li>✓ .More than a third of them were interested in learning more about HPV.</li> <li>✓ Women are interested in receiving any information. 18% want more information on how HPV causes cancer. 15% wanted information on HPV vaccination (especially whether vaccinating their children to prevent cancer), 10% wanted information on how to prevent transmission to their partner, and 10% wanted to know if there was</li> </ul> |

|   |                               |       |                                                                                                                                                                                                                                                                                         |                                                                      |                                                                                                                                             |                                                                  |                                                                                                                                                                                                                                                                                                                                                                                                                                                                                                                                                                                                                                                                                                                                                                            |
|---|-------------------------------|-------|-----------------------------------------------------------------------------------------------------------------------------------------------------------------------------------------------------------------------------------------------------------------------------------------|----------------------------------------------------------------------|---------------------------------------------------------------------------------------------------------------------------------------------|------------------------------------------------------------------|----------------------------------------------------------------------------------------------------------------------------------------------------------------------------------------------------------------------------------------------------------------------------------------------------------------------------------------------------------------------------------------------------------------------------------------------------------------------------------------------------------------------------------------------------------------------------------------------------------------------------------------------------------------------------------------------------------------------------------------------------------------------------|
|   |                               |       |                                                                                                                                                                                                                                                                                         |                                                                      |                                                                                                                                             |                                                                  | any cure for Is there HPV or not?<br>The findings suggest that the diagnosis of HPV + OPSCC may have important psychosocial consequences including stigma, self-blame, and social interaction problems                                                                                                                                                                                                                                                                                                                                                                                                                                                                                                                                                                     |
| 5 | Dorothy Gold, et al.2012(44)  | U.S.A | The aim of this study was to understand a framework for describing and recognizing the psychosocial factors and challenges that HNC patients face, including those with HPV-related tumors during their disease stages from diagnosis, treatment, and recovery to survival. , it shows. | -                                                                    | Qualitative Study                                                                                                                           | -                                                                | <ul style="list-style-type: none"> <li>✓ Women with HPV need psychosocial care at different stages of the disease.</li> <li>✓ Shock, uncertainty, and fear of deformed limbs following genital warts, dysfunction, or disability. Patients with HNC face physical and psychological challenges during illness.</li> <li>✓ There is a high potential for psychosocial disorders, including anxiety and depression, during ongoing care, including survival.</li> <li>✓ Patients with HNC associated with human papillomavirus (HPV) are at risk for psychological stress due to their demographic characteristics as well as the viral cause of their tumors.</li> <li>✓ Failure to meet psychosocial needs can complicate the course of treatment and recovery.</li> </ul> |
| 6 | SungJong Lee1, et al.2012(37) | Korea | Identify the questions that women ask on the human papillomavirus-related website. (www.hpvkorea.org)                                                                                                                                                                                   | Of the 3062 subjects who visited the HPV website, 2330 asked general | Comparative Study<br>Data on all questions raised between March 2004 and July 2011 were collected and analyzed.<br>All questions on the HPV | Chi-square test.<br>Statistical analysis was performed using SAS | <ul style="list-style-type: none"> <li>✓ 10 categories for topics and sample questions with different topics are shown in.</li> <li>✓ Of the 3,062 people who visited the HPV website, 2,330 asked general questions</li> </ul>                                                                                                                                                                                                                                                                                                                                                                                                                                                                                                                                            |

|  |  |  |                                                   |                                                                                                                                                                                                                                                                                                                                                                                                                                |                                                                                                         |                                                                                                                                                                                                                                                                                                                                                                                                                                                                                                                                                                                                                                                                                                                                                                                                                                                                                                                                                                                                                                                                                                                                                                                                             |
|--|--|--|---------------------------------------------------|--------------------------------------------------------------------------------------------------------------------------------------------------------------------------------------------------------------------------------------------------------------------------------------------------------------------------------------------------------------------------------------------------------------------------------|---------------------------------------------------------------------------------------------------------|-------------------------------------------------------------------------------------------------------------------------------------------------------------------------------------------------------------------------------------------------------------------------------------------------------------------------------------------------------------------------------------------------------------------------------------------------------------------------------------------------------------------------------------------------------------------------------------------------------------------------------------------------------------------------------------------------------------------------------------------------------------------------------------------------------------------------------------------------------------------------------------------------------------------------------------------------------------------------------------------------------------------------------------------------------------------------------------------------------------------------------------------------------------------------------------------------------------|
|  |  |  | <p>questions and 732 asked private questions.</p> | <p>website were in Korean and in free text.<br/>         At the time of drafting, the text was being translated from Korean to English.<br/>         Data on all questions raised between March 2004 and July 2011 were collected and analyzed.<br/>         All questions on the HPV website were in Korean and in free text.<br/>         At the time of drafting, the text was being translated from Korean to English.</p> | <p>program, version 8.0.<br/>         P &lt;0.05 ✓<br/>         values were defined as significant.</p> | <p>and 732 asked private questions.<br/>         ✓ The type and frequency of public and private questions showed a statistical difference between the two groups (p &lt;0.001).<br/>         ✓ From 2004 to 2011, the most common questions are as follows: Frequency and percentage of each question are as follows.<br/> <b>1. Treatment of HPV and cervical dysplasia 1156(37.8)</b><br/>         Is HPV treatable? What treatment is recommended for HPV infection?<br/>         What is the best treatment for my condition (for example, cervical dysplasia?)<br/> <b>2. How HPV is transmitted 684 (22.3)</b><br/>         Ask for information about the routes of transmission and duration of HPV infection<br/>         Do other people become infected with HPV by sharing towels or bowls of soup?<br/>         Have I got HPV infection from my partner?<br/>         Does skin warts spread to other parts of the body than to the genitals?<br/>         Is genital warts transmitted to the baby during breastfeeding?<br/> <b>3. HPV regression 481(15.7)</b><br/>         How long does it take for an HPV infection to go away on its own?<br/>         Does a negative HPV DNA test</p> |
|--|--|--|---------------------------------------------------|--------------------------------------------------------------------------------------------------------------------------------------------------------------------------------------------------------------------------------------------------------------------------------------------------------------------------------------------------------------------------------------------------------------------------------|---------------------------------------------------------------------------------------------------------|-------------------------------------------------------------------------------------------------------------------------------------------------------------------------------------------------------------------------------------------------------------------------------------------------------------------------------------------------------------------------------------------------------------------------------------------------------------------------------------------------------------------------------------------------------------------------------------------------------------------------------------------------------------------------------------------------------------------------------------------------------------------------------------------------------------------------------------------------------------------------------------------------------------------------------------------------------------------------------------------------------------------------------------------------------------------------------------------------------------------------------------------------------------------------------------------------------------|



|   |               |       |                                                  |                |                                                               |                      |                                                                                                                                                                                                                                                                                                                                                                                                                                                                                                                                                                                                                                                                                                                                                                                                                                                                                                                                                                                                                                                                                                                                                                                                   |
|---|---------------|-------|--------------------------------------------------|----------------|---------------------------------------------------------------|----------------------|---------------------------------------------------------------------------------------------------------------------------------------------------------------------------------------------------------------------------------------------------------------------------------------------------------------------------------------------------------------------------------------------------------------------------------------------------------------------------------------------------------------------------------------------------------------------------------------------------------------------------------------------------------------------------------------------------------------------------------------------------------------------------------------------------------------------------------------------------------------------------------------------------------------------------------------------------------------------------------------------------------------------------------------------------------------------------------------------------------------------------------------------------------------------------------------------------|
|   |               |       |                                                  |                |                                                               |                      | <p>really indicate that the HPV virus has been removed from the body?</p> <p><b>4 .Genital warts 174(5.7)</b><br/>Why do genital warts recur even after successful treatment?<br/>If a small lump is found in the genital area, is it a genital wart?</p> <p><b>5. .Risk factors for cervical cancer 147(4.8)</b><br/>What is the risk of cervical cancer after HPV infection?<br/>What is the risk of cervical cancer due to cervical dysplasia?</p> <p><b>6. HPV vaccination 116(3.8)</b><br/><b>How effective is HPV vaccination?</b><br/>Which company vaccine is most effective in preventing HPV?<br/>When can the vaccine be used?</p> <p><b>7. Prevention of HPV 90(2.9)</b><br/><b>How to prevent HPV infection?</b><br/>Are Diets Good for HPV Prevention?<br/>Can condoms always prevent HPV infection?</p> <p><b>8. Vaginal discharge 86 (2.8)</b><br/><b>Is vaginal discharge</b> associated with symptoms of HPV infection?</p> <p><b>9. HPV and pregnancy 81(2.6)</b><br/>Is HPV transmitted from mother to baby during pregnancy?</p> <p><b>10.Laryngeal cancer and HPV 47(1.5)</b><br/>If a lump or lump is felt in the mouth, is this laryngeal cancer associated with HPV?</p> |
| 7 | Sandra Millon | U.S.A | The aim of this study was to obtain the required | 4 single women | cross-sectional, mixed methods, exploratory survey design was | Content analysis for | Women age 18 to 44 years. Sexual behavior, chronic                                                                                                                                                                                                                                                                                                                                                                                                                                                                                                                                                                                                                                                                                                                                                                                                                                                                                                                                                                                                                                                                                                                                                |

|  |                           |  |                                                        |  |                    |                                                                                                                |                                                                                                                                                                                                                                                                                                                                                                                                                                                                                                                                                                                                                                                                                                                                                                                                                                                                                                                                                                                                                                                                                                                                                                            |
|--|---------------------------|--|--------------------------------------------------------|--|--------------------|----------------------------------------------------------------------------------------------------------------|----------------------------------------------------------------------------------------------------------------------------------------------------------------------------------------------------------------------------------------------------------------------------------------------------------------------------------------------------------------------------------------------------------------------------------------------------------------------------------------------------------------------------------------------------------------------------------------------------------------------------------------------------------------------------------------------------------------------------------------------------------------------------------------------------------------------------------------------------------------------------------------------------------------------------------------------------------------------------------------------------------------------------------------------------------------------------------------------------------------------------------------------------------------------------|
|  | Underwood ,etal.2010 (28) |  | information about HPV, cervical cancer and condom use. |  | used in this study | <p>qualitative stdy</p> <p>Quantitative data analysis of SPSS using descriptive and inferential statistics</p> | <p>infections, HPV, are risk factors for cervical cancer.</p> <p>76.8% (352) of women reported having had sexual activity in the last six months. Among them, 62.2 (219) reported having one sexual partner, 15.6% (55) reported having two sexual partners and 22.2% (78) reported having three or more partners in the past six months.</p> <p>Floors and basements include:</p> <p><b>Cause of HPV</b></p> <p>Where does HPV come from?<br/> How does one actually get it?<br/> How many different types of HPV are there? Do all types of HPV cause cancer? Do some types of HPV cause warts?<br/> How is HPV diagnosed in a sexual partner? What are HPV lesions like?<br/> Why cervical cancer is called a sexually transmitted disease?<br/> Can I get HPV infection without having sex?<br/> Can I get HPV from contact with strangers?<br/> Is HPV transmitted from person to person by kissing? Can it be transmitted to the throat?<br/> Who is most at risk for HPV infection?<br/> Does having more than one sexual partner increase a person's risk of contracting HPV?<br/> Does HPV increase with sexual activity?<br/> Where does the infection enter</p> |
|--|---------------------------|--|--------------------------------------------------------|--|--------------------|----------------------------------------------------------------------------------------------------------------|----------------------------------------------------------------------------------------------------------------------------------------------------------------------------------------------------------------------------------------------------------------------------------------------------------------------------------------------------------------------------------------------------------------------------------------------------------------------------------------------------------------------------------------------------------------------------------------------------------------------------------------------------------------------------------------------------------------------------------------------------------------------------------------------------------------------------------------------------------------------------------------------------------------------------------------------------------------------------------------------------------------------------------------------------------------------------------------------------------------------------------------------------------------------------|

|  |  |  |  |  |  |                                                                                                                                                                                                                                                                                                                                                                                                                                                                                                                                                                                                                                                                                                                                                                                                                                                                                                                                                                                                                                                                                                                                                         |
|--|--|--|--|--|--|---------------------------------------------------------------------------------------------------------------------------------------------------------------------------------------------------------------------------------------------------------------------------------------------------------------------------------------------------------------------------------------------------------------------------------------------------------------------------------------------------------------------------------------------------------------------------------------------------------------------------------------------------------------------------------------------------------------------------------------------------------------------------------------------------------------------------------------------------------------------------------------------------------------------------------------------------------------------------------------------------------------------------------------------------------------------------------------------------------------------------------------------------------|
|  |  |  |  |  |  | <p>the body?</p> <p><b>Cause of cervical cancer</b></p> <p>What is the main cause of cervical cancer?</p> <p>Is cervical cancer inherited? If we do not have a family history, what is the cause of this disease?</p> <p>Who is most at risk for cervical cancer?</p> <p>Does having more than one sexual partner increase the risk of cervical cancer?</p> <p>What is cervical cancer like?</p> <p>Does anyone diagnosed with HPV infection get cervical cancer?</p> <p><b>Signs and symptoms of HPV infection</b></p> <p>How do we know if we have been exposed to HPV or become infected with HPV?</p> <p>What are the signs and symptoms of HPV infection?</p> <p><b>Signs and symptoms of cervical cancer</b></p> <p>What are the symptoms of cervical cancer? Are there any early warning signs?</p> <p>Does cervical cancer cause pain?</p> <p><b>HPV and cervical cancer screening</b></p> <p>How easy is it for doctors to diagnose cervical cancer?</p> <p>Is a Pap smear really enough to diagnose?</p> <p>Can HPV be detected before cancer develops?</p> <p>In addition to annual examinations, what kind of examination should we do?</p> |
|--|--|--|--|--|--|---------------------------------------------------------------------------------------------------------------------------------------------------------------------------------------------------------------------------------------------------------------------------------------------------------------------------------------------------------------------------------------------------------------------------------------------------------------------------------------------------------------------------------------------------------------------------------------------------------------------------------------------------------------------------------------------------------------------------------------------------------------------------------------------------------------------------------------------------------------------------------------------------------------------------------------------------------------------------------------------------------------------------------------------------------------------------------------------------------------------------------------------------------|

|   |                                     |         |                                                                                                                          |                                                                                        |                                                                                                                                                                                                                                                                                                      |                              |                                                                                                                                                                                                                                                                                                                                                                                                                                                                                                                                                                                          |
|---|-------------------------------------|---------|--------------------------------------------------------------------------------------------------------------------------|----------------------------------------------------------------------------------------|------------------------------------------------------------------------------------------------------------------------------------------------------------------------------------------------------------------------------------------------------------------------------------------------------|------------------------------|------------------------------------------------------------------------------------------------------------------------------------------------------------------------------------------------------------------------------------------------------------------------------------------------------------------------------------------------------------------------------------------------------------------------------------------------------------------------------------------------------------------------------------------------------------------------------------------|
|   |                                     |         |                                                                                                                          |                                                                                        |                                                                                                                                                                                                                                                                                                      |                              | <p><b>HPV vaccine</b><br/> Is there a vaccine to prevent HPV?<br/> How effective is the vaccine?<br/> Is the vaccine safe?<br/> Why is the vaccine so expensive?<br/> Where can I go to get the vaccine in the community?<br/> Where can I get more information about the HPV vaccine?</p> <p><b>HPV and cervical cancer risk management</b><br/> What can be done to reduce the risk of HPV infection and cervical cancer?<br/> What can we do to prevent girls and younger women from being exposed?<br/> What can older women do to reduce their risk of HPV and cervical cancer?</p> |
| 8 | Veronique Verhoeven, et al.2010(32) | Belgium | Determine the specific information needs of people searching the Internet for information on human papillomavirus (HPV). | 527 emails were received in which 713 separate questions were identified and answered. | Data on all questions raised between March 2004 and July 2011 were collected and analyzed.<br>All questions on the HPV website were in Korean and in free text. At the time of writing the manuscript, the text was translated from Korean to English.<br>Website address:<br>(www.ua.ac.be/hpvinfo) | qualitative content analysis | All questions are categorized in one of the following topics<br>In descending order: <ul style="list-style-type: none"> <li>▪ transfer (n =162)</li> <li>▪ Vaccine (n =98)</li> <li>▪ Natural history (n =70)</li> <li>▪ Defective circle (n=60) (meaning: the belief that two Partners with HPV infection continue to infect each other, so it is not possible to clear the virus.</li> <li>▪ Diagnosis of HPV in men (n=52)</li> <li>▪ Diagnosis of HPV in women (n =41)</li> <li>▪ Treatment in women (n=40)</li> <li>▪ Commune period (n=34)</li> </ul>                              |

|  |  |  |  |  |  |                                                                                                                                                                                                                                                                                                                                                                                                                                                                                                                                                                                                                                                                                                                                                                                                                                                                                                                                                                                                                                                                                                                                                                                                                                                                                                             |
|--|--|--|--|--|--|-------------------------------------------------------------------------------------------------------------------------------------------------------------------------------------------------------------------------------------------------------------------------------------------------------------------------------------------------------------------------------------------------------------------------------------------------------------------------------------------------------------------------------------------------------------------------------------------------------------------------------------------------------------------------------------------------------------------------------------------------------------------------------------------------------------------------------------------------------------------------------------------------------------------------------------------------------------------------------------------------------------------------------------------------------------------------------------------------------------------------------------------------------------------------------------------------------------------------------------------------------------------------------------------------------------|
|  |  |  |  |  |  | <ul style="list-style-type: none"> <li>▪ Pregnancy / fertility (n = 27)</li> <li>▪ Genital warts (n = 23)</li> <li>▪ Loyalty and unfaithfulness (n = 21)</li> <li>▪ Treatment in men (n=19)</li> <li>▪ Symptoms of HPV infection (n=10)</li> </ul> <ol style="list-style-type: none"> <li>1 .When did I get the virus? when? Did my partner take it from a former relationship or betray me?</li> <li>2. Is the virus transmitted through towels, dirty toilet seats, pets?</li> <li>3. Can children be infected with HPV?</li> <li>4. What can be done to prevent HPV transmission?</li> <li>5. When diagnosed with HPV in a couple. What are the consequences for his wife and sexual partner? Do you have a sexual partner? Should he test?</li> <li>6. I have HPV and my husband will probably get it too. Won't we constantly infect each other?</li> <li>7. When I got HPV. What to say to my partner, ex-partner, and my lover. To?..</li> <li>8 .I have HPV. Does this fact affect my sex life?</li> <li>9.Does HPV infection jeopardize my chances of getting pregnant?</li> <li>10. I just got my first HPV vaccine. Should I abstain from sex until after the third injection? Can I have sex while using a condom?</li> <li>11.I was diagnosed with HPV. Is vaccination good for me?</li> </ol> |
|--|--|--|--|--|--|-------------------------------------------------------------------------------------------------------------------------------------------------------------------------------------------------------------------------------------------------------------------------------------------------------------------------------------------------------------------------------------------------------------------------------------------------------------------------------------------------------------------------------------------------------------------------------------------------------------------------------------------------------------------------------------------------------------------------------------------------------------------------------------------------------------------------------------------------------------------------------------------------------------------------------------------------------------------------------------------------------------------------------------------------------------------------------------------------------------------------------------------------------------------------------------------------------------------------------------------------------------------------------------------------------------|

|   |                           |         |                                                      |                                                                                         |                                                                                                                                                            |                             |                                                                                                                                                                                                                                                                                                                                                                                                                                                                                                                                                                                                                                                                                                                                                                                                                                                                                                                                                                                                                                                                  |
|---|---------------------------|---------|------------------------------------------------------|-----------------------------------------------------------------------------------------|------------------------------------------------------------------------------------------------------------------------------------------------------------|-----------------------------|------------------------------------------------------------------------------------------------------------------------------------------------------------------------------------------------------------------------------------------------------------------------------------------------------------------------------------------------------------------------------------------------------------------------------------------------------------------------------------------------------------------------------------------------------------------------------------------------------------------------------------------------------------------------------------------------------------------------------------------------------------------------------------------------------------------------------------------------------------------------------------------------------------------------------------------------------------------------------------------------------------------------------------------------------------------|
| 9 | Laura A V Marlow,2009(29) | British | This study aimed to identify key questions about HPV | <ul style="list-style-type: none"> <li>▪ 21 women</li> <li>▪ 18-53 years old</li> </ul> | <ul style="list-style-type: none"> <li>▪ Face-to-face interview</li> <li>▪ The samples were entered into the study using the snowball technique</li> </ul> | thematic framework analysis | <p>The questions were in 6 themes:</p> <p><b>Identity (for example, what are the symptoms?)</b><br/> Does HPV have symptoms?<br/> Is it really common in the UK?</p> <p><b>Cause (for example, how do you get HPV?)</b><br/> How to fight HPV?<br/> Can HPV be transmitted in a way other than sexually?<br/> Is HPV more common in young people?<br/> Are women who are multiple partners and sex workers more at risk?<br/> Does drinking alcohol increase the risk of infection?</p> <p><b>Schedule (for example, how long does it take?)</b><br/> How long does it take for HPV to become cervical cancer?<br/> How long can the virus remain dormant?</p> <p><b>Consequences (for example, does it always cause the cervix?)</b><br/> How many cases of HPV become cervical cancer?<br/> Is HPV the only cause of cervical cancer?<br/> What other cancers are caused by this virus?<br/> Can I get pregnant with this virus?<br/> Does HPV have other effects on the body?<br/> Are Genital Warts and Cancer Related?<br/> How many women get cervical</p> |
|---|---------------------------|---------|------------------------------------------------------|-----------------------------------------------------------------------------------------|------------------------------------------------------------------------------------------------------------------------------------------------------------|-----------------------------|------------------------------------------------------------------------------------------------------------------------------------------------------------------------------------------------------------------------------------------------------------------------------------------------------------------------------------------------------------------------------------------------------------------------------------------------------------------------------------------------------------------------------------------------------------------------------------------------------------------------------------------------------------------------------------------------------------------------------------------------------------------------------------------------------------------------------------------------------------------------------------------------------------------------------------------------------------------------------------------------------------------------------------------------------------------|

|  |  |  |  |  |  |                                                                                                                                                                                                                                                                                                                                                                                                                                                                                                                                                                                                                                                                                                                                                                                                                                                                                                                                                                                                                                    |
|--|--|--|--|--|--|------------------------------------------------------------------------------------------------------------------------------------------------------------------------------------------------------------------------------------------------------------------------------------------------------------------------------------------------------------------------------------------------------------------------------------------------------------------------------------------------------------------------------------------------------------------------------------------------------------------------------------------------------------------------------------------------------------------------------------------------------------------------------------------------------------------------------------------------------------------------------------------------------------------------------------------------------------------------------------------------------------------------------------|
|  |  |  |  |  |  | <p>cancer?<br/> How is cervical cancer treated with treatment?<br/> Can a man get HPV?<br/> Does it affect men?<br/> Should the sexual partner be notified if the HPV test is positive?<br/> <b>Treatment control (e.g. Can you prevent infection?)</b></p> <p>Is there a way to protect yourself against HPV?<br/> Does using a condom protect against the virus?<br/> What is the treatment for HPV?<br/> What does the treatment of cellular changes involve?<br/> How long does it take for this virus to clear the body?<br/> Why do some people clean it with their immune system, but others do not?<br/> How often should you go for a checkup?<br/> At what age should screening for the virus begin?<br/> <b>Methods: HPV testing/vaccination</b><br/> What does the [HPV] test include?<br/> Can I get an HPV test from a doctor?<br/> How long does it take to determine the result of an HPV test?<br/> Is HPV included in the STI test?<br/> Is Pap smear different from HPV?<br/> How effective is the vaccine?</p> |
|--|--|--|--|--|--|------------------------------------------------------------------------------------------------------------------------------------------------------------------------------------------------------------------------------------------------------------------------------------------------------------------------------------------------------------------------------------------------------------------------------------------------------------------------------------------------------------------------------------------------------------------------------------------------------------------------------------------------------------------------------------------------------------------------------------------------------------------------------------------------------------------------------------------------------------------------------------------------------------------------------------------------------------------------------------------------------------------------------------|

|    |                         |                  |                                                                                                                                           |                                                                                                                                                                                |                                                                                                                                                                                                                          |                                                                                      |                                                                                                                                                                                                                                                                                                                                                                                                                                                                                                                                                                                                                                                                                                                                                                        |
|----|-------------------------|------------------|-------------------------------------------------------------------------------------------------------------------------------------------|--------------------------------------------------------------------------------------------------------------------------------------------------------------------------------|--------------------------------------------------------------------------------------------------------------------------------------------------------------------------------------------------------------------------|--------------------------------------------------------------------------------------|------------------------------------------------------------------------------------------------------------------------------------------------------------------------------------------------------------------------------------------------------------------------------------------------------------------------------------------------------------------------------------------------------------------------------------------------------------------------------------------------------------------------------------------------------------------------------------------------------------------------------------------------------------------------------------------------------------------------------------------------------------------------|
|    |                         |                  |                                                                                                                                           |                                                                                                                                                                                |                                                                                                                                                                                                                          |                                                                                      | <p>What are the side effects of the vaccine?</p> <p>What are the long-term effects of the vaccine?</p> <p>How does the vaccine work, is it a bit of a virus?</p> <p>Can the virus be vaccinated?</p> <p>Is the vaccine for prevention or treatment?</p> <p>How many vaccinations should be given?</p> <p>How many years have they been working on the vaccine?</p> <p>Who has the vaccine been tested on?</p> <p>Who has tested the vaccine?</p> <p>Will the vaccine be suitable for everyone?</p> <p>Is the vaccination only for a certain age group?</p> <p>When is the vaccine available?</p> <p>Will the vaccination be free for everyone?</p> <p>Does the vaccine also protect against warts?</p> <p>↳Should I have a Pap smear and test after the injection?</p> |
| 10 | Allison Let al.2008(45) | African-American | This study aims to understand the results of HPV and Pap smear test entitled: What do women with HPV need and want to know? Was performed | <ul style="list-style-type: none"> <li>▪ A total of ten focus groups (N = 90)</li> <li>▪ Age</li> <li>▪ 30-45 years; 46-65 years</li> <li>▪ Language English/Spnish</li> </ul> | <ul style="list-style-type: none"> <li>▪ Qualitative Study</li> <li>▪ Participants' knowledge about cervical cancer and HPV and the reactions of each group were recorded with more than 2 observers / notes.</li> </ul> | The results were analyzed using a note-based strategy with three independent judges. | <p>According to the study, participants were aware of HPV and cervical cancer, but did not have the necessary knowledge. They were confused about the nature of the disease, the severity, the transmission, the types, the treatment, and the instructions for the HPV test, and needed to have complete information because they stated that this reduced their anxiety and caused them to follow up. Do</p>                                                                                                                                                                                                                                                                                                                                                         |



|    |                           |           |                                                                 |   |   |   |                                                                                                                                                                                                                                                                                                                                                                                                                                                                                                                                                                                                                                                                                                                                                                                           |
|----|---------------------------|-----------|-----------------------------------------------------------------|---|---|---|-------------------------------------------------------------------------------------------------------------------------------------------------------------------------------------------------------------------------------------------------------------------------------------------------------------------------------------------------------------------------------------------------------------------------------------------------------------------------------------------------------------------------------------------------------------------------------------------------------------------------------------------------------------------------------------------------------------------------------------------------------------------------------------------|
|    |                           |           |                                                                 |   |   |   | <p>the necessary.</p> <p>Many questions about your sexual partner and how to deal with it If you have the virus, several concepts of HPV for women are contradictory and must be carefully explained to ensure that patients understand their test results.</p> <p>Do not experience unnecessary fear, anxiety or stigma; And return for follow-up. Recommendations are provided to meet these patient needs.</p>                                                                                                                                                                                                                                                                                                                                                                         |
| 11 | Suzanne M. et al.2006(38) | Australia | Purpose, how to manage and communicate with patients about HPV? | - | - | - | <p>The needs of the community in relation to HPV</p> <ul style="list-style-type: none"> <li>✓ What is HPV and how do we get it?</li> <li>✓ How long does the infection stay in the body and does it lead to cancer?</li> <li>✓ How is HPV diagnosed?</li> <li>✓ Despite a normal Pap smear, is there no cure for the virus?</li> <li>✓ Who should do the HPV DNA test and when?</li> <li>✓ HPV can cause cancer: Are other cancers caused by these microorganisms?</li> <li>✓ Does taking OCP pills affect this disease? Should it be stopped? How long does taking the pill cause uterine cancer?</li> <li>✓ I have had this partner for many years. Now that I'm positive for HPV, does that mean she've had sex with someone else?</li> <li>✓ Is there a difference between</li> </ul> |

|    |                                   |           |                                                                                                                                                                           |                                                                             |                       |              |                                                                                                                                                                                                                                                                                                                                                                                                                                                                                                                                                                                                                                                                                                                                                                                                                                                                                                                                                                                                                     |
|----|-----------------------------------|-----------|---------------------------------------------------------------------------------------------------------------------------------------------------------------------------|-----------------------------------------------------------------------------|-----------------------|--------------|---------------------------------------------------------------------------------------------------------------------------------------------------------------------------------------------------------------------------------------------------------------------------------------------------------------------------------------------------------------------------------------------------------------------------------------------------------------------------------------------------------------------------------------------------------------------------------------------------------------------------------------------------------------------------------------------------------------------------------------------------------------------------------------------------------------------------------------------------------------------------------------------------------------------------------------------------------------------------------------------------------------------|
|    |                                   |           |                                                                                                                                                                           |                                                                             |                       |              | <p>a low-risk and a high-risk type?</p> <ul style="list-style-type: none"> <li>✓ Do I have to tell my partner?</li> <li>✓ Do I have to quit smoking?</li> <li>✓ If my spouse and I were in the beginning of a virgin relationship, how can I have an abnormal HPV or Pap smear?</li> </ul>                                                                                                                                                                                                                                                                                                                                                                                                                                                                                                                                                                                                                                                                                                                          |
| 12 | KirstenMc Caffery, etal.2005 (35) | Australia | The aim of this study was to determine the information needs of women about the role of human papillomavirus (HPV) in cervical cancer and how to prevent cervical cancer. | 19 women with HPV infection were selected after routine cervical screening. | Qualitative interview | face-to-face | <p>Framework Analysis</p> <ol style="list-style-type: none"> <li>1. Women's perception of HPV <ul style="list-style-type: none"> <li>✓ Knowledge of HPV before current diagnosis</li> <li>✓ The patient's current understanding of HPV</li> </ul> </li> <li>2. Required information about HPV <ul style="list-style-type: none"> <li>✓ High-risk types of HPV against genital warts</li> <li>✓ Sexual transmission: Where does the virus come from?</li> <li>✓ Impact on sexual partner, future partners and disease transmission between partners</li> <li>✓ Outbreak of HPV, information on recurrence and recovery</li> <li>✓ Information on management and treatment options</li> <li>✓ Consequences of cancer risk and fertility</li> <li>✓ Lack of appropriate and available information</li> <li>✓ Key information that women reported as reliable information</li> <li>✓ High prevalence of HPV</li> <li>✓ How the disease goes away on its own</li> <li>✓ Creating cancer following</li> </ul> </li> </ol> |

|    |                                |     |                                                                                                          |   |                   |   |                                                                                                                                                                                                                                                                                                                                                                                                                                                                                                                                                                                                                                                                                                      |
|----|--------------------------------|-----|----------------------------------------------------------------------------------------------------------|---|-------------------|---|------------------------------------------------------------------------------------------------------------------------------------------------------------------------------------------------------------------------------------------------------------------------------------------------------------------------------------------------------------------------------------------------------------------------------------------------------------------------------------------------------------------------------------------------------------------------------------------------------------------------------------------------------------------------------------------------------|
|    |                                |     |                                                                                                          |   |                   |   | <p>infection with the virus</p> <ul style="list-style-type: none"> <li>✓ Absence of genital warts and symptoms of the disease</li> </ul> <p>3. How to present HPV results</p> <ul style="list-style-type: none"> <li>✓ Using the phone</li> <li>✓ Using letters</li> <li>✓ During the consultation</li> </ul> <p>4. Physician communication method</p> <ul style="list-style-type: none"> <li>✓ Notification style</li> <li>✓ Amount of information</li> </ul> <p>5. HPV information retrieval experiences</p>                                                                                                                                                                                       |
| 13 | Rebecca Anhang, et al.2004(15) | USA | Determining the relevance of HPV: Reviewing existing research and recommendations for educating patients | - | Qualitative Study | - | <p>According to this study, information and psychological needs were among the important needs of individuals, which include:</p> <ul style="list-style-type: none"> <li>✓ How and when did I get HPV?</li> <li>✓ Does HPV affect pregnancy or the baby?</li> <li>✓ Can a person get HPV orally or by hand?</li> <li>✓ How can I get tested for HPV?</li> <li>✓ Do I always have HPV?</li> <li>✓ How can HPV be prevented from being given or received?</li> <li>✓ Can partners re-infect each other?</li> <li>✓ Does HPV cause cervical cancer?</li> <li>✓ What should I tell my partner about HPV?</li> <li>✓ What are the best HPV treatment options?</li> </ul> <p>Looking for psychological</p> |

|  |  |  |  |  |  |  |                                                                                                                                                                                                                                                                                                                                                                                                                                                                              |
|--|--|--|--|--|--|--|------------------------------------------------------------------------------------------------------------------------------------------------------------------------------------------------------------------------------------------------------------------------------------------------------------------------------------------------------------------------------------------------------------------------------------------------------------------------------|
|  |  |  |  |  |  |  | <p>problems such as:</p> <ul style="list-style-type: none"> <li>▪ Anxiety</li> <li>▪ Regret</li> <li>▪ Angry</li> <li>▪ Fear of cancer</li> <li>▪ Concerns about loss of reproductive functions</li> <li>▪ Fear of negative reactions from friends, family or sexual partners</li> <li>▪ Concerns about partner infidelity or enmity with a person are thought to be a source of infection</li> <li>▪ Changes in body image</li> <li>▪ Reduce intimate activities</li> </ul> |
|--|--|--|--|--|--|--|------------------------------------------------------------------------------------------------------------------------------------------------------------------------------------------------------------------------------------------------------------------------------------------------------------------------------------------------------------------------------------------------------------------------------------------------------------------------------|

580  
581  
582  
583  
584  
585  
586  
587  
588  
589  
590  
591  
592  
593  
594  
595  
596  
597  
598  
599  
600

601  
602  
603  
604  
605  
606

Table2:CASP (Critical Appraisal Skills Programme) qualitative checklist scores for total included studies.

|                                    | CASP criterion         |                                  |                             |                            |                             |                                                           |                        |                        |                             | Total Score | Quality of study |                           |
|------------------------------------|------------------------|----------------------------------|-----------------------------|----------------------------|-----------------------------|-----------------------------------------------------------|------------------------|------------------------|-----------------------------|-------------|------------------|---------------------------|
|                                    | Clear statement of aim | Suitable qualitative methodology | Appropriate research design | Proper recruiting strategy | Adequacy in data collection | Adequate relationship between researcher and participants | Ethical considerations | Rigor in data analysis | Clear statement of findings |             |                  | Overall value of research |
| Sophie Mulcahy Symmons, et al.2021 |                        |                                  |                             |                            |                             |                                                           |                        |                        |                             |             | 19               | Moderate                  |
| Laura Marlow , et al.2020          |                        |                                  |                             |                            |                             |                                                           |                        |                        |                             |             | 20               | High                      |
| Qaderi, et al.2020                 |                        |                                  |                             |                            |                             |                                                           |                        |                        |                             |             | 20               | High                      |
| Dorothy Gold, et al.2012           |                        |                                  |                             |                            |                             |                                                           |                        |                        |                             |             | 14               | Low                       |
| Veronique Verhoeven, et al.2010    |                        |                                  |                             |                            |                             |                                                           |                        |                        |                             |             | 20               | High                      |
| Laura A V Marlow,2009              |                        |                                  |                             |                            |                             |                                                           |                        |                        |                             |             | 20               | High                      |
| KirstenMcCaffery, et al.2005       |                        |                                  |                             |                            |                             |                                                           |                        |                        |                             |             | 20               | High                      |
| Rebecca Anhang, et al.2004         |                        |                                  |                             |                            |                             |                                                           |                        |                        |                             |             | 17               | Moderate                  |

607  
608  
609  
610  
611  
612  
613  
614  
615  
616

617  
618  
619  
620  
621  
622  
623

Table3: CASP (Critical Appraisal Skills Programme) Crossectional checklist scores for total included studies.

| <b>CASP criterion</b>               |                         |                 |              |         |             |                  |
|-------------------------------------|-------------------------|-----------------|--------------|---------|-------------|------------------|
|                                     | Profile of participants | Evaluation tool | Study design | Results | Total Score | Quality of study |
| Kathrin Milbury et al.2013          |                         |                 |              |         | 18          | High             |
| SungJong Lee1, et al.2012           |                         |                 |              |         | 18          | High             |
| Sandra Millon Underwood, et al.2010 |                         |                 |              |         | 18          | High             |

624  
625  
626
